# Supplementary material for: Exploring the impact of ChatGPT: conversational AI in education
Source: Frontiers journal article supplement (doi:10.3389/feduc.2024.1379796), 2024-07-04
Supplement: Data_Sheet_2.docx [file Data_Sheet_2.docx]

# References

[1] M. Aljanabi and ChatGPT, “ChatGPT: Future Directions and Open possibilities,” *Mesopotamian J. Cyber Secur.*, vol. 2023, pp. 16–17, Jan. 2023, doi: 10.58496/mjcs/2023/003.

[2] H. H. Thorp, “ChatGPT is fun, but not an author,” *Science*, vol. 379, no. 6630. American Association for the Advancement of Science, p. 313, Jan. 2023. doi: 10.1126/science.adg7879.

[3] M. Ollivier *et al.*, “A deeper dive into ChatGPT: history, use and future perspectives for orthopaedic research,” *Knee Surgery, Sports Traumatology, Arthroscopy*, vol. 31, no. 4. Springer Science and Business Media Deutschland GmbH, pp. 1190–1192, Apr. 2023. doi: 10.1007/s00167-023-07372-5.

[4] P. ‘asher’ Rospigliosi, “Artificial intelligence in teaching and learning: what questions should we ask of ChatGPT?,” *Interactive Learning Environments*, vol. 31, no. 1. Routledge, pp. 1–3, 2023. doi: 10.1080/10494820.2023.2180191.

[5] E. Kasneci *et al.*, “ChatGPT for good? On opportunities and challenges of large language models for education,” *Learn. Individ. Differ.*, vol. 103, no. 102274, p. 102274, Apr. 2023, doi: 10.1016/j.lindif.2023.102274.

[6] T. Bin Arif, U. Munaf, and I. Ul-Haque, “The future of medical education and research: Is ChatGPT a blessing or blight in disguise?,” *Medical Education Online*, vol. 28, no. 1. Taylor & Francis, 2023. doi: 10.1080/10872981.2023.2181052.

[7] H. Alkaissi and S. I. McFarlane, “Artificial Hallucinations in ChatGPT: Implications in Scientific Writing,” *Cureus*, vol. 15, no. 2, Feb. 2023, doi: 10.7759/cureus.35179.

[8] N. Fijačko, L. Gosak, G. Štiglic, C. T. Picard, and M. John Douma, “Can ChatGPT pass the life support exams without entering the American heart association course?,” *Resuscitation*, vol. 185. 2023. doi: 10.1016/j.resuscitation.2023.109732.

[9] A. M. DiGiorgio and J. M. Ehrenfeld, “Artificial Intelligence in Medicine & ChatGPT: De-Tether the Physician,” *Journal of Medical Systems*, vol. 47, no. 1. Springer, pp. 1–2, Dec. 2023. doi: 10.1007/s10916-023-01926-3.

[10] P. P. Ray, “ChatGPT: A comprehensive review on background, applications, key challenges, bias, ethics, limitations and future scope,” *Internet Things Cyber-Physical Syst.*, vol. 3, pp. 121–154, 2023, doi: 10.1016/j.iotcps.2023.04.003.

[11] L. Kohnke, B. L. Moorhouse, and D. Zou, “ChatGPT for Language Teaching and Learning,” *RELC Journal*. SAGE Publications Ltd, Apr. 2023. doi: 10.1177/00336882231162868.

[12] D. Baidoo-Anu and L. Owusu Ansah, “Education in the Era of Generative Artificial Intelligence (AI): Understanding the Potential Benefits of ChatGPT in Promoting Teaching and Learning,” *SSRN Electron. J.*, Jan. 2023, doi: 10.2139/ssrn.4337484.

[13] Y. K. Dwivedi *et al.*, “‘So what if ChatGPT wrote it?’ Multidisciplinary perspectives on opportunities, challenges and implications of generative conversational AI for research, practice and policy,” *Int. J. Inf. Manage.*, vol. 71, p. 102642, Aug. 2023, doi: 10.1016/j.ijinfomgt.2023.102642.

[14] C. K. Lo, “What Is the Impact of ChatGPT on Education? A Rapid Review of the Literature,” *Education Sciences*, vol. 13, no. 4. MDPI, p. 410, Apr. 2023. doi: 10.3390/educsci13040410.

[15] S. Sok and K. Heng, “ChatGPT for Education and Research: A Review of Benefits and Risks,” *SSRN Electron. J.*, Mar. 2023, doi: 10.2139/ssrn.4378735.

[16] M. Sallam, “ChatGPT Utility in Healthcare Education, Research, and Practice: Systematic Review on the Promising Perspectives and Valid Concerns.,” *Healthc. (Basel, Switzerland)*, vol. 11, no. 6, p. 887, Mar. 2023, doi: 10.3390/healthcare11060887.

[17] S. Kitchenham, B. and Charters, “Guidelines for performing systematic literature reviews in software engineering,” *Tech. report, Ver. 2.3 EBSE Tech. Report. EBSE*, 2007.

[18] A. M. Hopkins, J. M. Logan, G. Kichenadasse, and M. J. Sorich, “Artificial intelligence chatbots will revolutionize how cancer patients access information: ChatGPT represents a paradigm-shift,” *JNCI Cancer Spectr.*, vol. 7, no. 2, Mar. 2023, doi: 10.1093/jncics/pkad010.

[19] S. O’Connor and ChatGPT, “Open artificial intelligence platforms in nursing education: Tools for academic progress or abuse?,” *Nurse Education in Practice*, vol. 66. 2023. doi: 10.1016/j.nepr.2022.103537.

[20] C. Ahn, “Exploring ChatGPT for information of cardiopulmonary resuscitation,” *Resuscitation*, vol. 185, p. 109729, Apr. 2023, doi: 10.1016/j.resuscitation.2023.109729.

[21] C. Zielinski *et al.*, “Chatbots, ChatGPT, and Scholarly Manuscripts: WAME Recommendations on ChatGPT and Chatbots in Relation to Scholarly Publications,” *Open Access Maced. J. Med. Sci.*, vol. 11, no. A, pp. 83–86, 2023, doi: 10.3889/oamjms.2023.11502.

[22] M. K. Looi, “Sixty seconds on . . . ChatGPT,” *BMJ*, vol. 380, p. p205, Jan. 2023, doi: 10.1136/bmj.p205.

[23] F. Huang, H. Kwak, and J. An, “Is ChatGPT better than Human Annotators? Potential and Limitations of ChatGPT in Explaining Implicit Hate Speech,” Feb. 2023, doi: 10.1145/3543873.3587368.

[24] R. A. Khan, M. Jawaid, A. R. Khan, and M. Sajjad, “ChatGPT-Reshaping medical education and clinical management,” *Pakistan J. Med. Sci.*, vol. 39, no. 2, pp. 605–607, Mar. 2023, doi: 10.12669/pjms.39.2.7653.

[25] N. Helberger and N. Diakopoulos, “ChatGPT and the AI Act,” *Internet Policy Rev.*, vol. 12, no. 1, Feb. 2023, doi: 10.14763/2023.1.1682.

[26] R. W. McGee, “Who Were the 10 Best and 10 Worst U.S. Presidents?The Opinion of Chat GPT (Artificial Intelligence),” *SSRN Electron. J.*, Feb. 2023, doi: 10.2139/ssrn.4367762.

[27] M. Salvagno, F. S. Taccone, and A. G. Gerli, “Can artificial intelligence help for scientific writing?,” *Crit. Care*, vol. 27, no. 1, Dec. 2023, doi: 10.1186/s13054-023-04380-2.

[28] E. N. Naumova, “A mistake-find exercise: a teacher’s tool to engage with information innovations, ChatGPT, and their analogs,” *Journal of Public Health Policy*, vol. 44, no. 2. Palgrave Macmillan, pp. 173–178, Jun. 2023. doi: 10.1057/s41271-023-00400-1.

[29] M. Perkins, “Academic Integrity considerations of AI Large Language Models in the post-pandemic era: ChatGPT and beyond,” *J. Univ. Teach. Learn. Pract.*, vol. 20, no. 2, 2023, doi: 10.53761/1.20.02.07.

[30] F. J. García-Peñalvo, “La percepción de la Inteligencia Artificial en contextos educativos tras el lanzamiento de ChatGPT: disrupción o pánico,” *Educ. Knowl. Soc.*, vol. 24, p. e31279, 2023, doi: 10.14201/eks.31279.

[31] N. Manohar and S. S. Prasad, “Use of ChatGPT in Academic Publishing: A Rare Case of Seronegative Systemic Lupus Erythematosus in a Patient With HIV Infection,” *Cureus*, 2023, doi: 10.7759/cureus.34616.

[32] D. Zhu, J. Chen, K. Haydarov, X. Shen, W. Zhang, and M. Elhoseiny, “ChatGPT Asks, BLIP-2 Answers: Automatic Questioning Towards Enriched Visual Descriptions,” *arxiv.org*, 2023, [Online]. Available: https://arxiv.org/abs/2303.06594

[33] S. Badini, S. Regondi, E. Frontoni, R. P.-A. I. and, and undefined 2023, “Assessing the capabilities of ChatGPT to improve additive manufacturing troubleshooting,” *Elsevier*.

[34] Z. G. Cai, D. A. Haslett, X. Duan, S. Wang, and M. J. Pickering, “Does ChatGPT resemble humans in language use?,” *arxiv.org*, 2023, [Online]. Available: https://arxiv.org/abs/2303.08014

[35] T. Susnjak, “ChatGPT: The End of Online Exam Integrity?,” *arxiv.org*, 2022, [Online]. Available: https://arxiv.org/abs/2212.09292

[36] L. Luan, X. Lin, and W. Li, “Exploring the Cognitive Dynamics of Artificial Intelligence in the Post-COVID-19 and Learning 3.0 Era: A Case Study of ChatGPT,” Feb. 2023, [Online]. Available: http://arxiv.org/abs/2302.04818

[37] J. White *et al.*, “A Prompt Pattern Catalog to Enhance Prompt Engineering with ChatGPT,” *arxiv.org*, 2023, [Online]. Available: https://arxiv.org/abs/2302.11382

[38] X. Zhai, “ChatGPT for Next Generation Science Learning,” *SSRN Electron. J.*, Jan. 2023, doi: 10.2139/ssrn.4331313.

[39] B. Guo *et al.*, “How Close is ChatGPT to Human Experts? Comparison Corpus, Evaluation, and Detection,” *arxiv.org*, 2023, [Online]. Available: https://arxiv.org/abs/2301.07597

[40] A. Thurzo, M. Strunga, R. Urban, J. Surovková, and K. I. Afrashtehfar, “Impact of Artificial Intelligence on Dental Education: A Review and Guide for Curriculum Update,” *Education Sciences*, vol. 13, no. 2. 2023. doi: 10.3390/educsci13020150.

[41] H. Lee, “The Rise of ChatGPT: Exploring its Potential in Medical Education,” *Anat. Sci. Educ.*, Mar. 2023, doi: 10.1002/ase.2270.

[42] A. Haleem, M. Javaid, and R. P. Singh, “An era of ChatGPT as a significant futuristic support tool: A study on features, abilities, and challenges,” *BenchCouncil Trans. Benchmarks, Stand. Eval.*, vol. 2, no. 4, p. 100089, 2022, doi: 10.1016/j.tbench.2023.100089.

[43] M. Khalil and E. Er, “Will ChatGPT get you caught? Rethinking of Plagiarism Detection,” Feb. 2023, [Online]. Available: http://arxiv.org/abs/2302.04335

[44] X. Yang, Y. Li, X. Zhang, H. Chen, and W. Cheng, “Exploring the Limits of ChatGPT for Query or Aspect-based Text Summarization,” *arxiv.org*, 2023, [Online]. Available: https://arxiv.org/abs/2302.08081

[45] R. K. Sinha, A. Deb Roy, N. Kumar, and H. Mondal, “Applicability of ChatGPT in Assisting to Solve Higher Order Problems in Pathology,” *Cureus*, vol. 15, no. 2, Feb. 2023, doi: 10.7759/cureus.35237.

[46] A. Azaria, “ChatGPT Usage and Limitations,” *Hal Open Sci.*, no. December, 2022, [Online]. Available: https://hal.science/hal-03913837/

[47] D. Mhlanga, “Open AI in Education, the Responsible and Ethical Use of ChatGPT Towards Lifelong Learning,” *SSRN Electron. J.*, 2023, doi: 10.2139/ssrn.4354422.

[48] T. Y. Zhuo, Y. Huang, C. Chen, and Z. Xing, “Exploring AI Ethics of ChatGPT: A Diagnostic Analysis,” Jan. 2023, [Online]. Available: http://arxiv.org/abs/2301.12867

[49] J. Willems, “ChatGPT at Universities – The Least of Our Concerns,” *SSRN Electron. J.*, 2023, doi: 10.2139/ssrn.4334162.

[50] S. Liu *et al.*, “Assessing the Value of ChatGPT for Clinical Decision Support Optimization,” *medRxiv*, p. 2023.02.21.23286254, 2023, doi: 10.1101/2023.02.21.23286254.

[51] L. De Angelis *et al.*, “ChatGPT and the Rise of Large Language Models: The New AI-Driven Infodemic Threat in Public Health,” *SSRN Electron. J.*, 2023, doi: 10.2139/ssrn.4352931.

[52] M. Aljanabi, M. Ghazi, A. Hussein Ali, S. Abas Abed, and C. Author, “ChatGpt: Open Possibilities,” *Iraqi J. Comput. Sci. Math.*, vol. 4, no. 1, pp. 62–64, Jan. 2023, doi: 10.52866/20ijcsm.2023.01.01.0018.

[53] S. Huh, “Issues in the 3rd year of the COVID-19 pandemic, including computer-based testing, study design, ChatGPT, journal metrics, and appreciation to reviewers,” *Journal of educational evaluation for health professions*, vol. 20. Korea Health Personnel Licensing Examination Institute, p. 5, 2023. doi: 10.3352/jeehp.2023.20.5.

[54] M. Halaweh, “ChatGPT in education: Strategies for responsible implementation,” *Contemp. Educ. Technol.*, vol. 15, no. 2, p. ep421, 2023, doi: 10.30935/cedtech/13036.

[55] T. Kuzman, I. Mozetič, and N. Ljubešić, “ChatGPT: Beginning of an End of Manual Linguistic Data Annotation? Use Case of Automatic Genre Identification,” Mar. 2023, [Online]. Available: http://arxiv.org/abs/2303.03953

[56] R. W. McGee, “Is Chat Gpt Biased Against Conservatives? An Empirical Study,” *SSRN Electron. J.*, 2023, doi: 10.2139/ssrn.4359405.

[57] Ö. Aydın and E. Karaarslan, “OpenAI ChatGPT Generated Literature Review: Digital Twin in Healthcare,” *SSRN Electron. J.*, 2022, doi: 10.2139/ssrn.4308687.

[58] F. M. Megahed, Y.-J. Chen, J. A. Ferris, S. Knoth, and L. A. Jones-Farmer, “How Generative AI models such as ChatGPT can be (Mis)Used in SPC Practice, Education, and Research? An Exploratory Study,” Feb. 2023, doi: 10.1080/08982112.2023.2206479.

[59] G. H. Sun and S. H. Hoelscher, “The ChatGPT Storm and What Faculty Can Do,” *Nurse Educ.*, vol. Publish Ah, 2023, doi: 10.1097/nne.0000000000001390.

[60] L. Ante and E. Demir, “The ChatGPT Effect on AI-Themed Cryptocurrencies,” *SSRN Electron. J.*, 2023, doi: 10.2139/ssrn.4350557.

[61] M. Alshater, “Exploring the Role of Artificial Intelligence in Enhancing Academic Performance: A Case Study of ChatGPT,” *SSRN Electron. J.*, 2023, doi: 10.2139/ssrn.4312358.

[62] M. AlAfnan, S. Dishari, … M. J.-J. of A., and undefined 2023, “Chatgpt as an educational tool: Opportunities, challenges, and recommendations for communication, business writing, and composition courses,” *ojs.istp-press.com*, doi: 10.37965/jait.2023.0184.

[63] S. Shahriar and K. Hayawi, “Let’s have a chat! A Conversation with ChatGPT: Technology, Applications, and Limitations,” *arXiv Prepr. arXiv2302.13817*, Feb. 2023, [Online]. Available: http://arxiv.org/abs/2302.13817

[64] Ö. Aydın, E. K.-W. is beyond expectations, and undefined 2023, “Is ChatGPT leading generative AI? What is beyond expectations?,” *papers.ssrn.com*.

[65] L. Bishop, “A Computer Wrote this Paper: What ChatGPT Means for Education, Research, and Writing,” *SSRN Electron. J.*, Jan. 2023, doi: 10.2139/ssrn.4338981.

[66] J. H. Lubowitz, “ChatGPT, An Artificial Intelligence Chatbot, Is Impacting Medical Literature,” *Arthrosc. J. Arthrosc. Relat. Surg.*, 2023, doi: 10.1016/j.arthro.2023.01.015.

[67] “How ChatGPT Could Revolutionize Academia - IEEE Spectrum.” Accessed: Jul. 10, 2023. [Online]. Available: https://spectrum.ieee.org/how-chatgpt-could-revolutionize-academia

[68] R. Gozalo-Brizuela and E. C. Garrido-Merchan, “ChatGPT is not all you need. A State of the Art Review of large Generative AI models,” Jan. 2023, [Online]. Available: http://arxiv.org/abs/2301.04655

[69] S. Mitrović, D. Andreoletti, and O. Ayoub, “ChatGPT or Human? Detect and Explain. Explaining Decisions of Machine Learning Model for Detecting Short ChatGPT-generated Text,” Jan. 2023, [Online]. Available: http://arxiv.org/abs/2301.13852

[70] Y. Tan *et al.*, “Evaluation of ChatGPT as a Question Answering System for Answering Complex Questions,” *arxiv.org*, 2023, [Online]. Available: https://arxiv.org/abs/2303.07992

[71] F. Sun, “ChatGPT , the Start of a New Era,” no. December, pp. 1–16, 2022.

[72] J. H. Choi, K. E. Hickman, A. Monahan, and D. B. Schwarcz, “ChatGPT Goes to Law School,” *SSRN Electron. J.*, 2023, doi: 10.2139/ssrn.4335905.

[73] A. Lecler, L. Duron, and P. Soyer, “Revolutionizing radiology with GPT-based models: Current applications, future possibilities and limitations of ChatGPT,” *Diagn. Interv. Imaging*, 2023, doi: 10.1016/j.diii.2023.02.003.

[74] W. Hasty, “ChatGPT,” 2023, [Online]. Available: https://strathprints.strath.ac.uk/84563/

[75] C. Macdonald, D. Adeloye, A. Sheikh, and I. Rudan, “Can ChatGPT draft a research article? An example of population-level vaccine effectiveness analysis,” *Journal of global health*, vol. 13. p. 1003, 2023. doi: 10.7189/jogh.13.01003.

[76] J. V Pavlik, “Collaborating With ChatGPT: Considering the Implications of Generative Artificial Intelligence for Journalism and Media Education,” *Journal. Mass Commun. Educ.*, vol. 78, no. 1, pp. 84–93, Mar. 2023, doi: 10.1177/10776958221149577.

[77] X. Zhai, “ChatGPT user experience: Implications for education,” *papers.ssrn.com*, Dec. 2022.
